# Supplementary material for: Rapid and automated design of two-component protein nanomaterials using ProteinMPNN
Source: PubMed Central journal article supplement — Proc Natl Acad Sci U S A. 2024 Mar 19;121(13):e2314646121. doi: 10.1073/pnas.2314646121 (PMC10990136; doi:10.1073/pnas.2314646121), 2024-03-19
Supplement: pnas.2314646121.sapp.pdf [file pnas.2314646121.sapp.pdf]

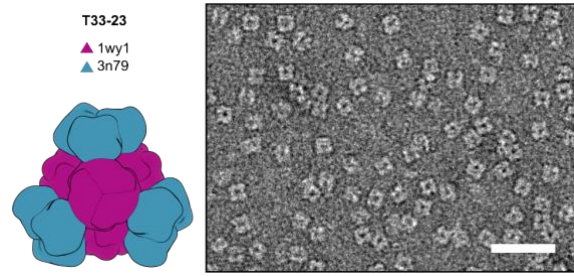

**Figure S1. Negative stain electron microscopy of purified T33-23.** *Left:* Computational design model and the PDB entry from which each of the two trimeric components (A, purple; B, blue) were derived. *Right:* Negatively stained electron micrograph of the co-expressed tetrahedral nanoparticle. Scale bar: 50 nm.

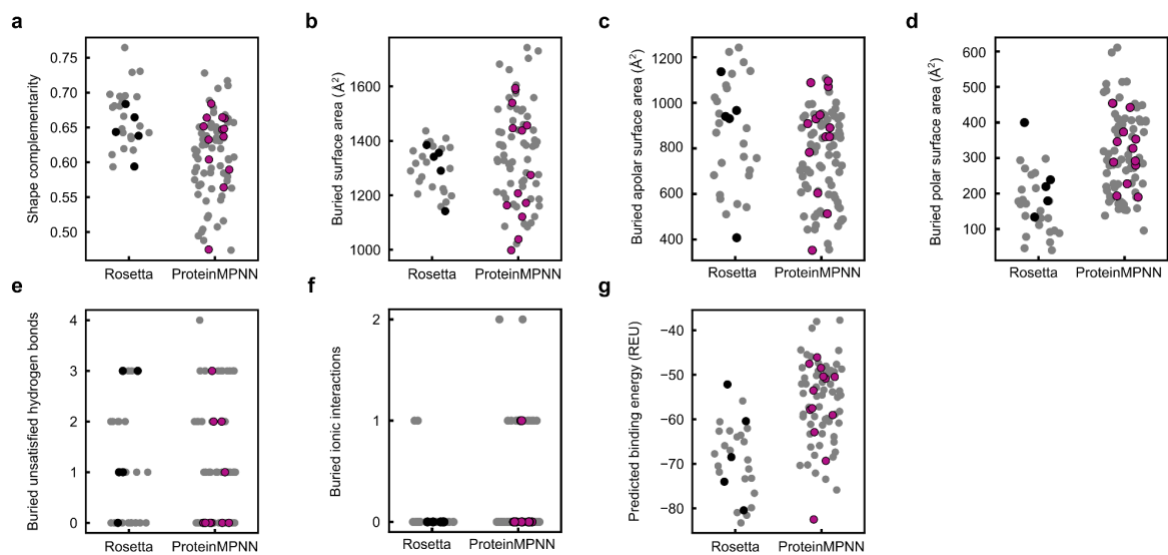

**Figure S2. Detailed scoring metrics of tetrahedral nanoparticle interface design with Rosetta and ProteinMPNN.** Interface scoring metrics plotted: **(a)** shape complementarity, **(b)** buried surface area in  $\text{\AA}^2$ , **(c)** buried apolar surface area, **(d)** buried polar surface area, **(e)** buried unsatisfied hydrogen bonds, **(f)** ionic interactions where at least one of the side chains is buried, and **(g)** predicted binding energy (ddG). Designs that failed to assemble into the target assemblies are shown in gray, while successful designs are shown in black (5 Rosetta designs) or purple (13 ProteinMPNN designs).

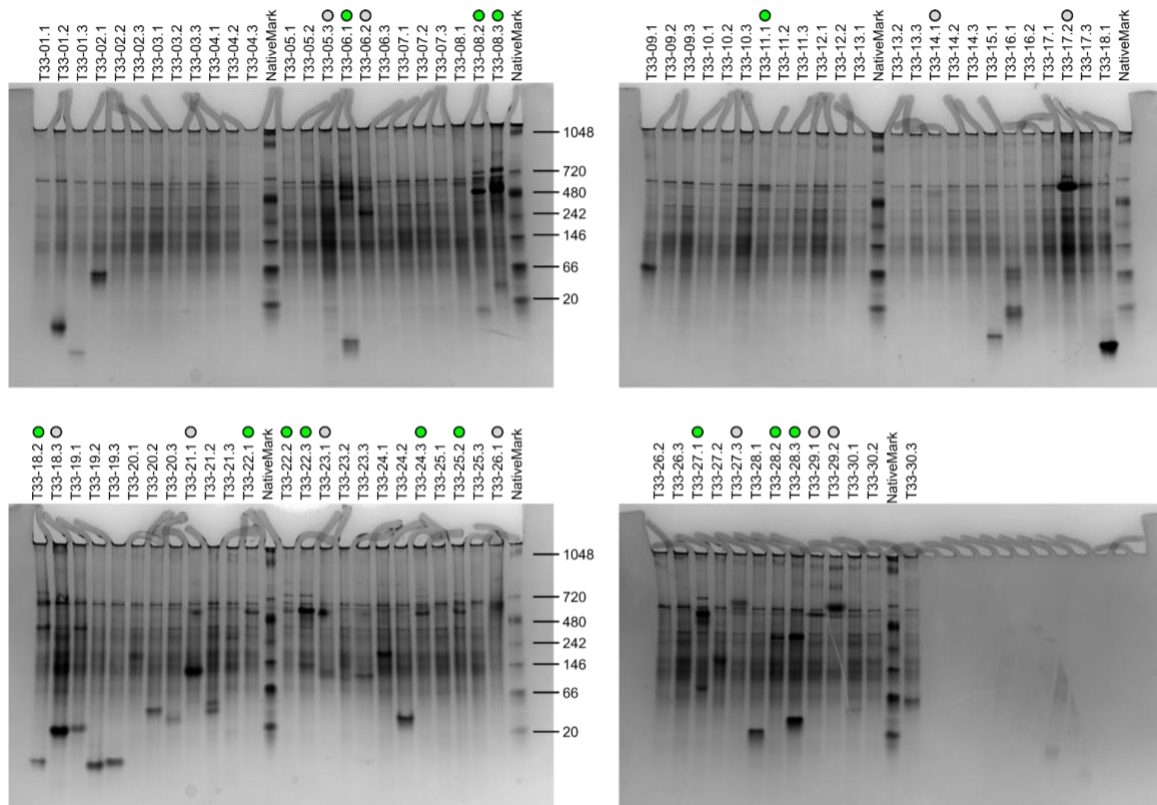

**Figure S3. Lysate screening of bicistronically expressed ProteinMPNN-designed tetrahedral nanoparticles.** Assembly into tetrahedral nanoparticles results in slower migration in native PAGE. 24 Designs yielding bands that migrated in  $\sim 0.5$ -1 MDa range were selected for further characterization. Circles indicate selected designs, green circles indicate designs that were eventually confirmed to assemble into tetrahedral nanoparticles. NativeMark (ThermoFisher Scientific) is loaded as reference with molecular weight in kDa as indicated. Note: apart from the 76 designs representing the 27 experimentally characterized docks described in King et al. (ref. <sup>20</sup>), an additional 9 ProteinMPNN designs were tested based on T33-19, T33-20, and T33-30, which were designed but not experimentally tested in King et al. None of the 9 ProteinMPNN designs exhibited indications of nanoparticle assembly. To ensure fair comparison of docks for which experimental data was available for both the Rosetta and ProteinMPNN design sets, these 9 designs were not further considered.

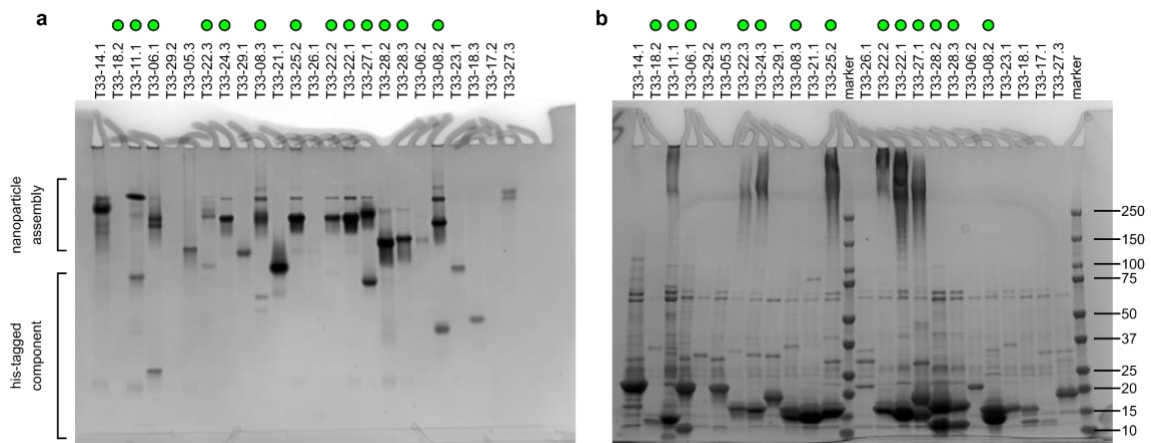

**Figure S4. Co-purification of 24 potential ProteinMPNN-designed tetrahedral nanoparticles. (a)** (Non)-denaturing PAGE of Ni-NTA purified tetrahedral assembly candidates. Assembled nanoparticles migrated slower in the gel compared to individual components. **(b)** Denaturing PAGE of Ni-NTA purified tetrahedral nanoparticle candidates. A and B components with different molecular weights (between ~10 and ~20 kDa) can be observed, indicating co-purification since only one of the two components contained a hexahistidine tag. Protein marker with molecular weights indicated in kDa is shown. Green colored circles indicate designs that were eventually confirmed to assemble into tetrahedral nanoparticles.

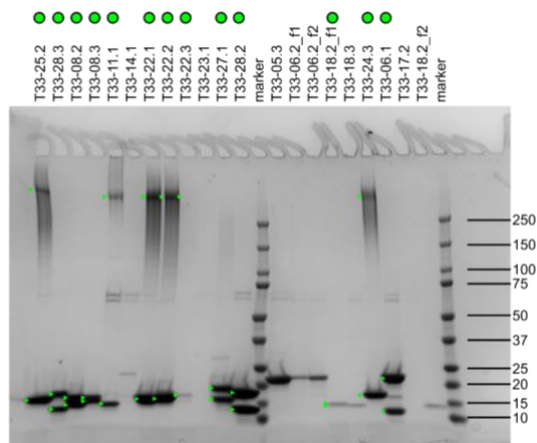

**Figure S5. Denaturing PAGE of isolated size exclusion chromatography nanoparticle peaks.** Nanoparticle peak (~13 mL) of a superdex S200 10/300 Increase column (Cytiva) is isolated. “f1” indicates peak isolated at ~13 mL and “f2” indicates peak isolated at ~14 mL. Marker with molecular weight indicated in kDa in figure. Green triangles indicate the two components. Green colored circles indicate designs that were eventually confirmed to assemble into tetrahedral nanoparticles. Note that for T33-25.2, T33-28.3, T33-11.1 T33-22.1, T33-22.2, T33-22.3 and T33-24.3 one of the two components does not fully migrate into the gel.

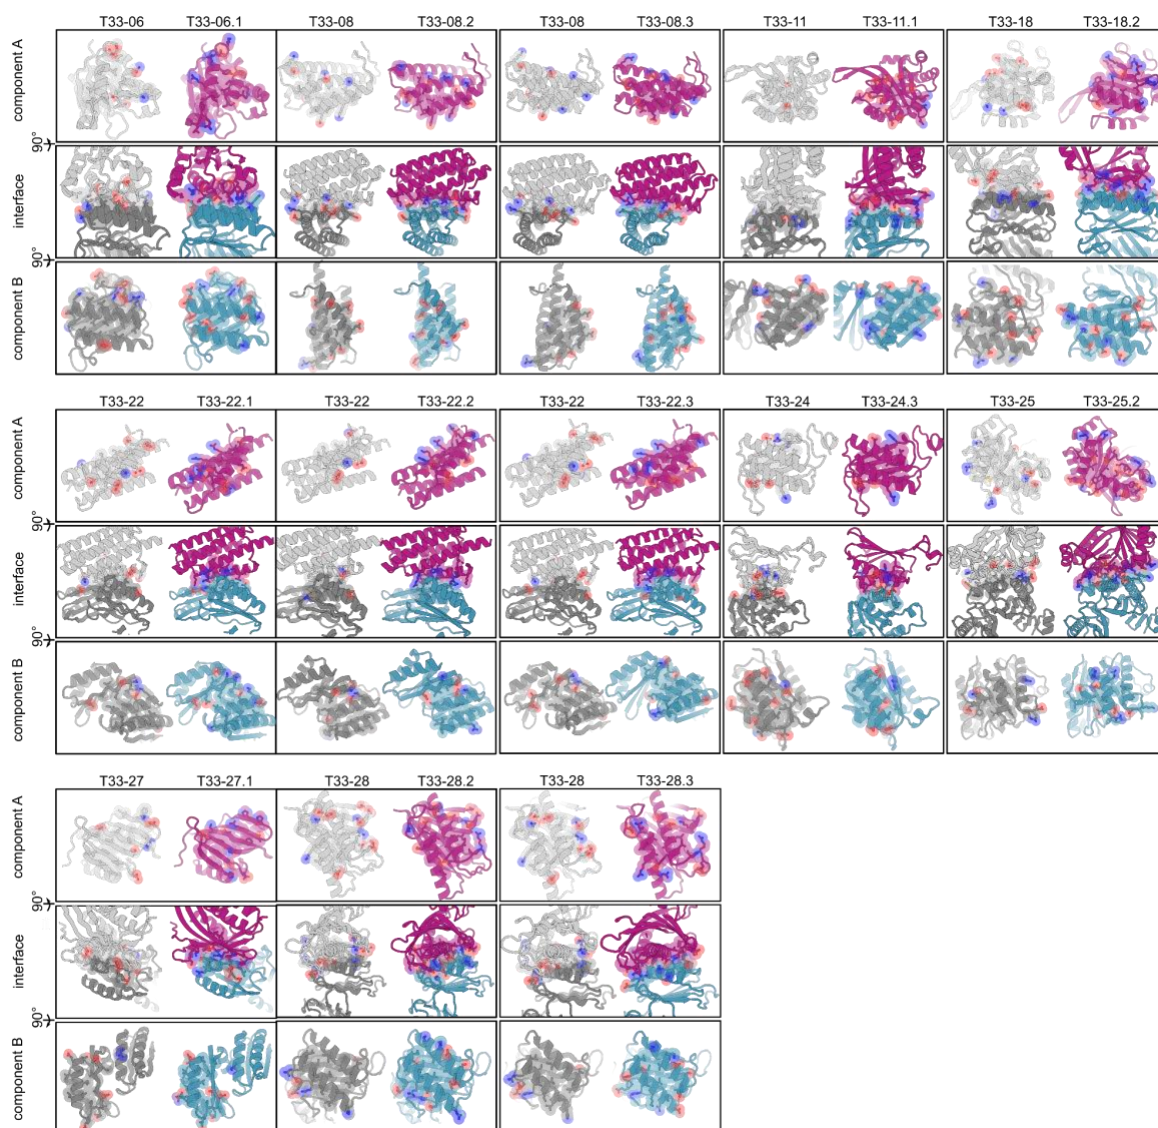

**Figure S6. Comparison of Rosetta-designed interfaces and ProteinMPNN-designed interfaces.** for all 13 confirmed ProteinMPNN-designed tetrahedral nanoparticles. All interface residue side chains within 5.5 Å distance across the interface are displayed as sticks, with oxygen and nitrogen atoms colored red and blue respectively, to highlight polar residues.

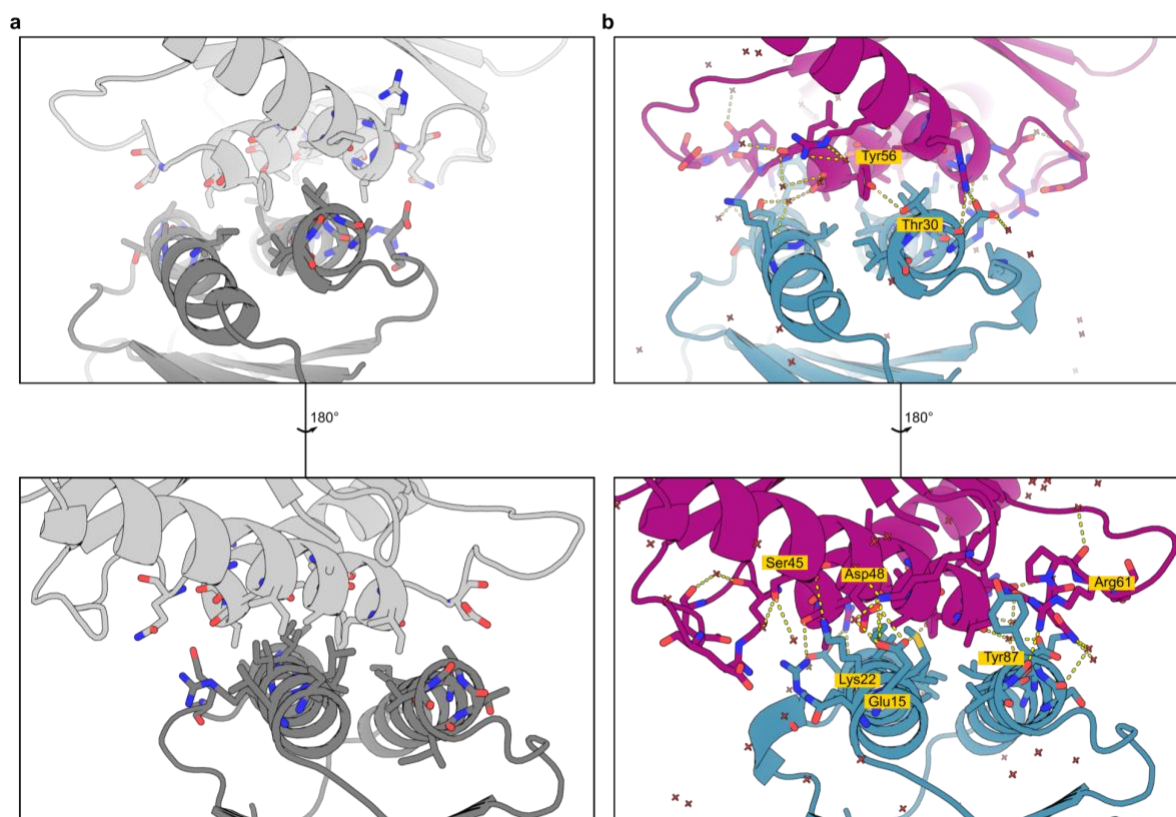

**Figure S7. Interface comparison of crystal structure of T33-28 and T33-28.3.** Two orientations at  $180^\circ$  of the interface of crystal structures T33-28 (PDB ID: 4NWR<sup>20</sup>) **(a)** and T33-28.3 (PDB ID: 8T6E) **(b)** are shown. All residues with heavy atoms at less than  $5.5 \text{ \AA}$  across the interface are visualized as sticks. All possible hydrogen bonding and ionic interactions across the interface and with water molecules at less than  $3.5 \text{ \AA}$  distance were visualized (yellow dotted lines). For the T33-28 crystal structure zero polar interactions were observed, but for T33-28.3 more than 10 interactions across the interface were present. Key polar mutations are highlighted in yellow in T33-28.3. Water molecules are visualized as red plusses.

**Table S1. Data collection and refinement statistics (molecular replacement).**

|                                                     | <b>T33-18.2<br/>(8T6C)</b>          | <b>T33-27.1 (8T6N)</b>              | <b>T33-28.3<br/>(8T6E)</b>          |
|-----------------------------------------------------|-------------------------------------|-------------------------------------|-------------------------------------|
| <b>Data collection</b>                              |                                     |                                     |                                     |
| Space group                                         | R3                                  | P 2 <sub>1</sub> 3                  | P 1                                 |
| Cell dimensions                                     |                                     |                                     |                                     |
| <i>a, b, c</i> (Å)                                  | 138.81, 138.81, 129.11              | 176.51, 176.51,<br>176.5            | 113.74, 114.05,<br>114.20           |
| <i>a, b, g</i> (°)                                  | 90, 90, 120                         | 90.00, 90.00,<br>90.00              | 62.09, 77.86,<br>89.41              |
| Resolution (Å)                                      | 56.87 - 1.92 (1.96 -<br>1.92)*      | 100 - 3.63 (3.69 -<br>3.63)*        | 48.47 - 2.48 (2.52<br>- 2.48)*      |
| R <sub>sym</sub> or R <sub>merge</sub>              | 0.085 (0.162)                       | 0.229 (0.063)                       | 0.062 (0.630)                       |
| I / σI                                              | 9.8 (0.1)                           | 22.69 (1.5)                         | 6.3 (0.7)                           |
| Completeness (%)                                    | 100 (100)                           | 100 (100)                           | 98.1 )97.5)                         |
| Redundancy                                          | 6.7 (6.7)                           | 21.5 (21.4)                         | 2.4 (2.2)                           |
| <b>Refinement</b>                                   |                                     |                                     |                                     |
| Resolution (Å)                                      | 56.87 - 1.92 (1.95 -<br>1.92)       | 48.96 - 3.63 (3.72<br>- 3.63)       | 48.47 - 2.48 (2.54<br>- 2.48)       |
| No. reflections                                     | 70444                               | 20763                               | 171172                              |
| <i>R</i> <sub>work</sub> / <i>R</i> <sub>free</sub> | 0.1977 (0.4685)/<br>0.2423 (0.5712) | 0.2142 (0.2654)/<br>0.2585 (0.3624) | 0.2053 (0.3513)/<br>0.2389 (0.4115) |
| No. atoms                                           |                                     |                                     |                                     |
| Protein                                             | 7211                                | 1175                                | 25202                               |
| Ligand/ion                                          | n/a                                 | n/a                                 | n/a                                 |
| Water                                               | 424                                 | n/a                                 | 593                                 |
| B-factors                                           |                                     |                                     |                                     |
| Protein                                             | 38.44                               | 91.68                               | 55.66                               |
| Ligand/ion                                          | n/a                                 | n/a                                 | n/a                                 |
| Water                                               | 40.79                               | n/a                                 | 50.57                               |
| R.m.s. deviations                                   |                                     |                                     |                                     |
| Bond lengths (Å)                                    | 0.004                               | 0.002                               | 0.002                               |
| Bond angles (°)                                     | 0.600                               | 0.432                               | 0.460                               |

\*A single crystal was used for each structure in the data collection. Values in parentheses are for the highest-resolution shell.



**Table S2. Amino acid sequences of novel proteins designed in this study.**

| Design   | Component A                                                                                                                                                                                                              | Component B                                                                                                                                                                                                                                     | MW Comp A (kDa) | MW Comp B (kDa) |
|----------|--------------------------------------------------------------------------------------------------------------------------------------------------------------------------------------------------------------------------|-------------------------------------------------------------------------------------------------------------------------------------------------------------------------------------------------------------------------------------------------|-----------------|-----------------|
| T33-01.1 | MPIFTLNTNIKATDVPSD<br>FLARTSRLVALILNKPGS<br>YVAVHINTDQQLSFGGS<br>TNPAAFGTLMSIGGIEP<br>GLNHAINCALTAELEHEL<br>GIAPERMYIHFVNLNGD<br>DVGWGYGTG                                                                               | MTEKEKMLAEKWYDANF<br>DQELIERRAKAAAICWAL<br>NNTRPSDTGRIKALIDALF<br>GKVTDNVSISIPFDTDY<br>ENVKLGKNVYVNTNCYF<br>MDGGQITIGDNVFIGPNC<br>GFYTATHPLNFHHRNEG<br>FEKAGPIHIGSNTWFGGH<br>VAVLPGVTIGEGSVIGAG<br>SVVTKDIPPHSLAVGNPC<br>KVVRKIDNDEGSHHHHH<br>H | 12.1            | 21.5            |
| T33-01.2 | MPIFTLNTNIKATDVPSD<br>FLARTSEAVSRILNKPG<br>SYVAVHINTDQQLSFGG<br>STNPAAFGTLMSIGGIEP<br>ENNEKLNVLTTLLEHE<br>LGIPADRMYYIHFVNLNG<br>DDVGWGYGTG                                                                               | MTEKEKMLAEKWYDANF<br>DQELIARRTRAILCYILN<br>NTRPSDKELRKLIDALF<br>RTKTDNVSISIPFDTDY<br>ENVKLGKNVYVNTNCYF<br>MDGGQITIGDNVFIGPNC<br>GFYTATHPLNFHHRNEG<br>FEKAGPIHIGSNTWFGGH<br>VAVLPGVTIGEGSVIGAG<br>SVVTKDIPPHSLAVGNPC<br>KVVRKIDNDEGSHHHHH<br>H   | 12.3            | 21.8            |
| T33-01.3 | MPIFTLNTNIKATDVPSD<br>FLDVT SRLVADLLEKPG<br>SYVAVHINTDQQLSFGG<br>STNPAAFGTLMSIGGIEP<br>GLNAAINAALTAVLEDLL<br>GIRGDRMYIHFVNLNGD<br>DVGWGYGTG                                                                              | MTEKEKMLAEKWYDANF<br>DQELIAERARAEICWAL<br>NNTRPSNKGRIRGLIEGL<br>FGKVTDNVSISIPFDTDY<br>GKNVKGKNVYVNTNCY<br>FMDGGQITIGDNVFIGPN<br>CGFYTATHPLNFHHRNE<br>GFEKAGPIHIGSNTWFG<br>GHVAVLPGVTIGEGSVIG<br>AGSVVTKDIPPHSLAVGN<br>PCKVVRKIDNDEGSHHH<br>HHH  | 12.0            | 21.5            |
| T33-02.1 | MHQIRVGVLTVDSCFR<br>NLAPDRSGEALKLYVQD<br>KDELGGTISAYKIVPDEI<br>EEIKETLIDWCDEKELNL<br>ILTTGGTGAFAPRDVTP<br>ATKEVIEREAPGMALAM<br>LMAASLSPEGMLSRPV<br>CGIRGKTLIINLPGSLIGS<br>LHCFDAILPALPHAIDLL<br>RDAIVKVKVHVLGSHHH<br>HHH | MPVIQTFVSTPLDHHKRE<br>ELAEVYRRVTREVLGKP<br>EDLVMMTFHDSTPMHFF<br>GSTDPVACVRVEALGGY<br>KENQPSVVTRTVSAAISL<br>ECGIVLERIFVLYFSPLHC<br>GWNGTNP                                                                                                       | 19.4            | 12.7            |
| T33-02.2 | MHQIRVGVLTVDSCFR<br>NLAKDRSGNALKWLQ                                                                                                                                                                                      | MPVIQTFVSTPLDHHKRE<br>NLAEVYRAVTREILGKPE                                                                                                                                                                                                        | 19.5            | 12.8            |

|          |                                                                                                                                                                                                                            |                                                                                                                                           |      |      |
|----------|----------------------------------------------------------------------------------------------------------------------------------------------------------------------------------------------------------------------------|-------------------------------------------------------------------------------------------------------------------------------------------|------|------|
|          | DPDLLGGTISAYKIVPDE<br>IEEIKETLIDWCDEKELN<br>LILTTGGTGAFPRDVTP<br>EATKEVIEREAPGMALA<br>MLMASLEVSPGMLSR<br>PVCGIRGKTLIINLPGST<br>VGSRLRCFLAILPALPHAI<br>DLLRDAIVKVKEVHHGS<br>HHHHH                                           | DLVMMTFHDSTPMHFFG<br>STDPVACVRVEALGGYR<br>EGEPELVTLIVTYAIEDEC<br>GIVKDRIFVLYFSPLHCG<br>WNGTNE                                             |      |      |
| T33-02.3 | MHQIRVGVLTVSDSCFR<br>NLAPDWSGNALKRLVQ<br>DPELLGGTISAYKIVPDE<br>IEEIKETLIDWCDEKELN<br>LILTTGGTGAFPRDVTP<br>EATKEVIEREAPGMALA<br>MLMHLSVSPRGMLSR<br>PVCGIRGKTLIINLPGSQI<br>GSLRCFLAILPALPHAID<br>LLRDAIVKVKEVHHGSH<br>HHHHH  | MPVIQTFVSTPLDHHKRE<br>ALAERYRAVTKEILGKPE<br>DLVMMTFHDSTPMHFFG<br>STDPVACVRVEALGGYK<br>EDEPELVTLIVTLSIEEEC<br>GIVKERIFVLYFSPLHCG<br>WNGTNP | 19.5 | 12.8 |
| T33-03.1 | MHQIRVGVLTVSDSCFR<br>NLERPLSGRALELYVQD<br>PKLLGGTISAYKIVPDEIE<br>EIKETLIDWCDEKELNLIL<br>TTGGTGAFPRDVTPEAT<br>KEVIEREAPGMALAMLM<br>GSLNITPLGMLSRPVCGI<br>RGKTLIINLPGSLLGSRV<br>CFKFILPALPHAIDLLRD<br>AIVKVKEVHHGSHHHHH<br>H | MPVIQTFVSTPLDELRR<br>SLVLVYRLVTEEVLGKPA<br>DLVMMTFHDSTPMHFFG<br>STDPVACVRVEALGGYG<br>PSEPEKVTEIVTRAITEVC<br>GIVADRIFVLYFSPLHCG<br>WNGTNL  | 19.6 | 12.5 |
| T33-03.2 | MHQIRVGVLTVSDSCFR<br>NLIPPLSGEALKIFVQDP<br>KLLGGTISAYKIVPDEIEE<br>IKETLIDWCDEKELNLILT<br>TGGTGAFPRDVTPEATK<br>EVIEREAPGMALAMLMG<br>SLNVTPLGMLSRPVCGI<br>RGKTLIINLPGSLLGSLQ<br>CFQFILPALPHAIDLLRD<br>AIVKVKEVHHGSHHHHH<br>H | MPVIQTFVSTPLDELRRQ<br>SLVLTYRIVTEKILGKPAD<br>LVMMTFHDSTPMHFFGS<br>TDPVACVRVEALGGYGP<br>SEPEKVTEIVTRAITEVCG<br>IVADRIFVLYFSPLHCGW<br>NGTNL | 19.5 | 12.5 |
| T33-03.3 | MHQIRVGVLTVSDSCFR<br>NLRPLSGRALEIFVQD<br>PELLGGTISAYKIVPDEIE<br>EIKETLIDWCDEKELNLIL<br>TTGGTGAFPRDVTPEAT<br>KEVIEREAPGMALAMLM<br>GSLNLTPLGMLSRPVCG<br>IRGKTLIINLPGSLLGSLS<br>CFRFILPALPHAIDLLRD<br>AIVKVKEVHEGSHHHHH<br>H  | MPVIQTFVSTPLDELRR<br>SLCLVYRIVTEEILGKPAD<br>LVMMTFHDSTPMHFFGS<br>TDPVACVRVEALGGYGP<br>SEPERVTRVVTEAITEVC<br>GIVADRIFVLYFSPLHCG<br>WNGTNL  | 19.6 | 12.6 |
| T33-04.1 | MHQIRVGVLTVSDSCFR                                                                                                                                                                                                          | MPVIQTFVSTPLDEDRE                                                                                                                         | 19.6 | 12.5 |

|          |                                                                                                                                                                                                                             |                                                                                                                                           |      |      |
|----------|-----------------------------------------------------------------------------------------------------------------------------------------------------------------------------------------------------------------------------|-------------------------------------------------------------------------------------------------------------------------------------------|------|------|
|          | NLRPDLSGKALEILVQD<br>PAFLGGTISAYKIVPDEI<br>EEIKETLIDWCDEKELNL<br>ILTTGGTGFAPRDVTPE<br>ATKEVIEREAPGMALAM<br>LMGSLKITPLGMLSRPV<br>CGIRGKTLIINLPGSLLG<br>SLRCFRFILPALPHAIDL<br>RDAIVKVKEVHHGSHHH<br>HHH                        | ALCLVYRIVTEEILGKPAD<br>LVMMTFHDSTPMHFFGS<br>TAPVACVRVEALGGYGP<br>SEPERVTEIVTKAITEVCG<br>IVADRIFVLYFSPLHCGW<br>NGTNL                       |      |      |
| T33-04.2 | MHQIRVGVLTVSDSCFR<br>NLRPDLSGRALARYVQ<br>DPRELGGTISAYKIVPDE<br>IEEIKETLIDWCDEKELN<br>LILTTGGTGFAPRDVTP<br>EATKEVIEREAPGMALA<br>MLMGSLKITPLGMLSRP<br>VCGIRGKTLIINLPGSLL<br>GSLECFR FILPALPHAID<br>LLRDAIVKVKEVHHGSH<br>HHHHH | MPVIQTFVSTPLNEARRE<br>ALVLVYRLVTKEILGKPE<br>DLVMMTFHDSTPMHFFG<br>STAPVACVRVEALGGYG<br>PSEPEKVTAVVTEAITEV<br>CGIVADRIFVLYFSPLHC<br>GWNGTNL | 19.6 | 12.4 |
| T33-04.3 | MHQIRVGVLTVSDSCFR<br>NLRPDLSGRALRRYVQ<br>DPAELGGTISAYKIVPDE<br>IEEIKETLIDWCDEKELN<br>LILTTGGTGFAPRDVTP<br>EATKEVIEREAPGMALA<br>MLMGSLKITPLGMLSRP<br>VCGIRGKTLIINLPGSLL<br>GSLRCFR FILPALPHAID<br>LLRDAIVKVKEVHHGSH<br>HHHHH | MPVIQTFVSTPLDEDRE<br>ALFLVYQLVTEEILGKPA<br>DLVMMTFHDSTPMHFFG<br>STAPVACVRVEALGGYG<br>PSEPEKVTAVVTKAITEV<br>CGIVADRIFVLYFSPLHC<br>GWNGTNL  | 19.7 | 12.5 |
| T33-05.1 | MHQIRVGVLTVSDSCFR<br>NLATDWSGEALKLYVSN<br>PKRLGGTISAYKIVPDEI<br>EEIKETLIDWCDEKELNL<br>ILTTGGTGFAPRDVTPE<br>ATKEVIEREAPGMALAM<br>LMGSLAVTPLGMLSRPV<br>CGIRGKTLIINLPGSLG<br>SLRCFEFILPALPHAIDL<br>RDAIVKVKEVHEGSHHH<br>HHH    | MPVIQTFVSTPLDHHKRE<br>NLAQAYRDVTRRILGKPE<br>DLVMMTFHDSTPMHFFG<br>STDPVACVRVEALGGYG<br>RGEPELVTLVVSLAIEKE<br>CGIVLERIFVLYFSPLHCG<br>WNGINF | 19.5 | 12.7 |
| T33-05.2 | MHQIRVGVLTVSDSCFR<br>NLARDRSGRALRLYVAN<br>PKELGGTISAYKIVPDEI<br>EEIKETLIDWCDEKELNL<br>ILTTGGTGFAPRDVTPE<br>ATKEVIEREAPGMALAM<br>LMGSLAVTPLGMLSRPV<br>CGIRGKTLIINLPGSLRG<br>SLRCFEFILPALPHAIDL<br>RDAIVKVKEVHHGSHHH<br>HHH   | MPVIQTFVSTPLDHHKRE<br>NLAQVYRDVTREILGKPE<br>DLVMMTFHDSTPMHFFG<br>STDPVACVRVEALGGYG<br>KDEPELVNLVVSLAIQEE<br>CGIVLDRIFVLYFSPLHCG<br>WNGINV | 19.6 | 12.7 |

|          |                                                                                                                                                                                                                             |                                                                                                                                                                                                                                         |      |      |
|----------|-----------------------------------------------------------------------------------------------------------------------------------------------------------------------------------------------------------------------------|-----------------------------------------------------------------------------------------------------------------------------------------------------------------------------------------------------------------------------------------|------|------|
| T33-05.3 | MHQIRVGVLTVSDSCFR<br>NLAEDWSGRALEYVVT<br>NPNELGGTISAYKIVPDE<br>IEEIKETLIDWCDEKELN<br>LILTTGGTGFAPRDVTP<br>EATKEVIEREAPGMALA<br>MLMGSLKVTPLGMLSR<br>PVCGIRGKTLIINLPGSL<br>EGSLRCFRFILPALPHAI<br>DLLRDAIVKVKEVHAGS<br>HHHHHH  | MPVIQTFVSTPLDHHKRE<br>NLAQVYRDVTRRILGKPE<br>DLVMMTFHDSTPMHFFG<br>STDPVACVRVEALGGYG<br>REQPELVTLVVSLAIDKE<br>CGIVLDRIFVLYFSPLHCG<br>WNGINF                                                                                               | 19.6 | 12.8 |
| T33-06.1 | MHQIRVGVLTVSDSCFR<br>NLRPDLSGRALERYVQ<br>DPKLLGGTISAYKIVPDE<br>IEEIKETLIDWCDEKELN<br>LILTTGGTGFAPRDVTP<br>EATKEVIEREAPGMALA<br>MLMGSLNITPLGMLSRP<br>VCGIRGKTLIINLPGSLL<br>GSLRCFDFILPALPHAID<br>LLRDAIVKVKEVHHGSH<br>HHHHH  | MPVIQTFVSTPLDEDDR<br>ALSLVYRYATEKILGKPA<br>DLVMMTFHDSTPMHFFG<br>STDPVACVRVEALGGYG<br>PSEPEEVTKLVTAATEV<br>CGIVADRIFVLYFSPLHC<br>GWNGTNV                                                                                                 | 19.6 | 12.4 |
| T33-06.2 | MHQIRVGVLTVSDSCFR<br>NLRPDLSGEALKIFVQD<br>PELLGGTISAYKIVPDEIE<br>EIKETLIDWCDEKELNLIL<br>TTGGTGFAPRDVTPEAT<br>KEVIEREAPGMALAMLM<br>GSLNRTPLGMLSRPVC<br>GIRGKTLIINLPGSLLGSL<br>RCFRFILPALPHAIDLLR<br>DAIVKVKEVHHGSHHHH<br>HH  | MPVIQTFVSTPLDEDDRT<br>ALCLVYRIVTERILGKPAD<br>LVMMTFHDSTPMHFFGS<br>TDPVACVRVEALGGYGP<br>SEPEEVTRVVTAATEVC<br>GIVADRIFVLYFSPLHCG<br>WNGTNV                                                                                                | 19.6 | 12.4 |
| T33-06.3 | MHQIRVGVLTVSDSCFR<br>NLRPDLSGEALRRIVQD<br>PALLGGTISAYKIVPDEIE<br>EIKETLIDWCDEKELNLIL<br>TTGGTGFAPRDVTPEAT<br>KEVIEREAPGMALAMLM<br>GSLNITPLGMLSRPVCGI<br>RGKTLIINLPGSLLGSLA<br>CFR FILPALPHAIDLLRD<br>AIVKVKEVHEGSHHHHH<br>H | MPVIQTFVSTPLDELDRA<br>SLDLVYRIATERILGKPAD<br>LVMMTFHDSTPMHFFGS<br>TDPVACVRVEALGGYGP<br>SEPEEVTRLVTEATEVC<br>GIVADRIFVLYFSPLHCG<br>WNGTNV                                                                                                | 19.5 | 12.4 |
| T33-07.1 | MALYFMGHMILVYSTFP<br>SEKIAEITGKALLAQRLIA<br>CFNAFEIRSGYWWKGE<br>VVQDKEWAAIFKTTEEK<br>EKELYEALRELHPEETP<br>AIFTLKVENILTEYMNWL<br>RESVLGE                                                                                     | MQAIGILELTSIAKGMELG<br>DAMLKSANVDLLVSKTIS<br>PGKFLMLGGDVPAIAKA<br>VIVGIGNAGEMLVDSRVIL<br>DIHPSVLP AISGLNSVDK<br>RQAVGIVETWSVAACIKA<br>ADAAVKGSNVTLVRVHM<br>AFGIGGKCYMVVAGDVS<br>DVNNAVTVASESAGEKG<br>LLVYRSVIPRPHEAMWR<br>QMVEGGSHHHHHH | 13.0 | 20.0 |

|          |                                                                                                                                                                                      |                                                                                                                                                                                                                                         |      |      |
|----------|--------------------------------------------------------------------------------------------------------------------------------------------------------------------------------------|-----------------------------------------------------------------------------------------------------------------------------------------------------------------------------------------------------------------------------------------|------|------|
| T33-07.2 | MALYFMGHMILVYSTFP<br>NELLAIEITGKALLAKRLIA<br>CFNAFEIRSGYWWKGEI<br>VQDKEWAAIFKTTEEKE<br>KELYEALREHVHFETPAI<br>FTLKVENILTEYMNWLR<br>ESVLGG                                             | MSQAIGILELTSIAKGMEL<br>GDAMLKSANVDLLVSKTI<br>SPGKFLMLGGDVLAIK<br>AVAVGLGAAGEMLVDSR<br>LITNIHPSVLP AISGLNSV<br>DKRQAVGIVETWSVAACI<br>KAADKAVKGSNVTLVRV<br>HMAFGIGGKCYMVVAGD<br>VSDVNNAVTVASESAGE<br>KLLLVYRSVIPRPHEAM<br>WRQMVEGGSHHHHHH | 13.0 | 20   |
| T33-07.3 | MALYFMGHMILVYSTFP<br>NEAQAQIVGKALLAQRLI<br>ACFNAFEIRSGYWWKGEI<br>EIVQDKEWAAIFKTTEEK<br>EKELYEALRELHVEETP<br>AIFTLKVENILTEYMNWL<br>RESVLGA                                            | MSQAIGILELTSIAKGMEL<br>GDAMLKSANVDLLVSKTI<br>SPGKFLMLGGDVLAIK<br>AVSVGLGNAGEMLVDSA<br>LLTNIHPSVLP AISGLNSV<br>DKRQAVGIVETWSVAACI<br>KAADKAVKGSNVTLVRV<br>HMAFGIGGKCYMVVAGD<br>VSDVNNAVTVASESAGE<br>KLLLVYRSVIPRPHEAM<br>WRQMVEGGSHHHHHH | 13.0 | 20   |
| T33-08.1 | MSPVVEVQGTIDELNSFI<br>GYALVLSRWDDIRNDLF<br>RIQNDFVLGEDVSTGG<br>KGRTVTLEMILDVKKTE<br>KMLKEIGKIELFVPPGG<br>VESASLHMARAVSRRL<br>RRIRAAAELTPINALVEL<br>YAEALSKILFMHALISNK<br>RLNIPEKIL   | MREPIIEANGTDELTSFI<br>GEAKHYVDEEMKGILEEI<br>QNDIYKIMGEIGSKGKIEG<br>IPLSSLNRLVDLIEREEM<br>VNKSFVLPGGTLES AKLD<br>VCRTIARRALLKVETVLR<br>EFGIGLVAVLYLEVELSELL<br>FLLARVIEIEKNKKGSHH<br>HHHH                                                | 16.8 | 17.2 |
| T33-08.2 | MSPVVEVQGTIDELNSFI<br>GYALVLSRWDDIRNDLF<br>RIQNDFVLGEDVSTGG<br>KGRTVTLEMIAELVKKK<br>YKMKKEIGKIELFVPPG<br>GSVESASLHMARAVSR<br>RLERRIEAAAKLTEINEL<br>VLLYAQALSRLFMHALI<br>SNKRLNIPEKIY | MNQPIIEANGTDELTSFI<br>GEAKHYVDEEMKGILEEI<br>QNDIYKIMGEIGSKGKIEG<br>ISDESLVKLLDLIEREEM<br>VNKSFVLPGGTLES AKLD<br>VCRTIARRATLKVKTVLE<br>EFGIGFNAVLYLEVELSELL<br>FLLARVIEIEKNKEGSHH<br>HHHH                                                | 16.9 | 17.2 |
| T33-08.3 | MSPVVEVQGTIDELNSFI<br>GYALVLSRWDDIRNDLF<br>RIQNDFVLGEDVSTGG<br>KGRTVTEEMVIELIKRYV<br>KMKKEIGKIELFVPPG<br>SVESASLHMARAVSRRL<br>ERRIEAAARLTPINELVL<br>AYAQALSRLFMHALISN<br>KRLNIPEKIL  | MNQPIIEANGTDELTSFI<br>GEAKHYVDEEMKGILEEI<br>QNDIYKIMGEIGSKGKIEG<br>ISDES VKLWDLIEREEM<br>MVNKS FVLPGGTLES AK<br>LDVCRTIARRAYLKVLT<br>VREFGIGLTAVLYLKLSE<br>LLFLLARVIEIEKNKEGSH<br>HHHHH                                                 | 16.9 | 17.3 |
| T33-09.1 | MEEVVLITVPSAEEAVRI<br>AYTLVEERLAACVNIIPG<br>VVKIYRWQGRV RVASTL<br>LLL VKTTTHAFPKL KERV<br>KALHPYTVPEIVALPIAE                                                                         | MVRGIRGAITVAADTDEA<br>ILAATIELLREMLRANGIQ<br>SYEELAAVIFTVTEDLTAA<br>FPARAAELIGMHRVPLLS<br>AREVPVPGSLKNVIRVLA                                                                                                                            | 11.7 | 14.3 |

|          |                                                                                                                                        |                                                                                                                                                                                                                |      |      |
|----------|----------------------------------------------------------------------------------------------------------------------------------------|----------------------------------------------------------------------------------------------------------------------------------------------------------------------------------------------------------------|------|------|
|          | GNREYLDWLRENTK                                                                                                                         | LWNTDTPQDRVRHVYLD<br>EAVRLRPDLESPGSHHH<br>HHH                                                                                                                                                                  |      |      |
| T33-09.2 | MEEVVLITVPSAEEAVRI<br>AYALVEERLAACVNIIPG<br>LVRIYRWQGRVVRVDHV<br>LLLLVKTTHAFPKLKER<br>VKALHPYTVPEIVALPIA<br>EGNREYLDWLRENTK            | MVRGIRGAITVAADTPEAI<br>YAATIELLRMLEANGIQ<br>SYEELAAVIFTVTEDLTAA<br>FPAAEARLIGMHRVPLLS<br>AREVPVPGSLKNVIRVLA<br>LWNTDTPQDRVRHVYLG<br>EAVRLRPDLESPGSHHH<br>HHH                                                   | 11.8 | 14.3 |
| T33-09.3 | MEEVVLITVPSAEDAVRI<br>ARALVEERLAACVNIIPG<br>VVEIYRWQGRVKVKHVL<br>LLLLVKTTHAFPKLKERV<br>KALHPYTVPEIVALPIAE<br>GNREYLDWLRENTK            | MVRGIRGAITVKADTPEAI<br>YAATVELLERMLAANGIQ<br>SYEELAAVIFTVTEDLTAA<br>FPADAARTIGMHRVPLLS<br>AREVPVPGSLKNVIRVLA<br>LWNTDTPQDRVRHVYLG<br>EAVRLRPDLESPGSHHH<br>HHH                                                  | 11.7 | 14.2 |
| T33-10.1 | MEEVVLITVPSEEVAIEIA<br>VALVEERLAACVNLPVPG<br>LIRIYRWNNRVVIEKELL<br>LLVKTTHAFPKLKERV<br>KALHPYTVPEIVALPIAE<br>GNREYLDWLRENTKGS<br>HHHHH | MGAMGPVDEQWIEILRIQ<br>ALCARYCLTINTQDGEG<br>WAGCFTDDGSFSFDGW<br>TITGRPALREYADAHARV<br>VRGRHLTTDLLYTVIGNIA<br>TGRSASVVTATAAGYKI<br>LGSGEYHDLKKKDGQW<br>RIHRDLRNDRLVSDPSV<br>AVNVADADVAAVVGHLL<br>AAARRLGTQDKN    | 12.8 | 18.4 |
| T33-10.2 | MEEVVLITVPSEGVASEI<br>ACALVHERLAACVNIVP<br>GLTRVYRWNNRVKVEN<br>ELLLLKTTTHAFPKLKE<br>RVKALHPYTVPEIVALPI<br>AEGNREYLDWLRENTK<br>GSHHHHH  | GHMGPVDEQWIEILRIQA<br>LCARYCLTINTQDGEGW<br>AGCFTEDGSFSFDGWTI<br>TGRPALREYADAHARVV<br>RGRHLTTDLLYTVSGNV<br>ASGRSASVVTATAAGY<br>KILGSGEYHDLVKKKDGQ<br>WRIHRDLRNDRLVSDP<br>SVA NVADADVAAVVGH<br>LLAAARRLGTQDKE    | 12.7 | 18.3 |
| T33-10.3 | MEEVVLITVPSEEVAIEIA<br>LALVEERLAACVNIVPGL<br>IRIYRWDNRVVIDKELL<br>LVKTTHAFPKLKERVK<br>ALHPYTVPEIVALPIAEG<br>NREYLDWLRENTKGS<br>HHHHH   | MGAMGPVDEQWIEILRIQ<br>ALCARYCLTINTQDGEG<br>WAGCFTEDGSFSFDGW<br>TITGRPALREYADAHARV<br>VRGRHLTTDLLYTVIGNL<br>ATGRSASVVTATAAGY<br>KILGSGEYHDVLLKKKDGQ<br>WRIASRDLRNDRLVSDP<br>SVA NVADADVAAVVGH<br>LLAAARRLGTQDES | 12.8 | 18.4 |
| T33-11.1 | MEEVVLITVPSDEEAVTI<br>AATLVSERLAACVNIVP<br>GLTSLYRWNNKVKSEK<br>EYLLLKTTTHAFPKLKE                                                       | MSQAIGILELTSIAKGMEL<br>GDAMLKSANVDLLVSKTI<br>SPGKFLMLGGDIGAIQQ<br>AIETGVGQAGEMLVDSL                                                                                                                            | 12.6 | 19.2 |

|          |                                                                                                                                          |                                                                                                                                                                                                                                   |      |      |
|----------|------------------------------------------------------------------------------------------------------------------------------------------|-----------------------------------------------------------------------------------------------------------------------------------------------------------------------------------------------------------------------------------|------|------|
|          | RVKALHSYTVPEIVALPI<br>AEGNREYLDWLRENTK<br>GSHHHHHH                                                                                       | VLENIHPSVLP AISGLNSV<br>DKRQAVGIVETWSVAACI<br>KAANVALESSDVT LVRVH<br>MAFGIGGKCYM VVAGDV<br>AQVELAVTAASLVAGSR<br>GLLVYRSVIPRPHEAMW<br>RQMVEG                                                                                       |      |      |
| T33-11.2 | MEEVVLITVPSLEEALVI<br>AGTLVNERLAACVNIVP<br>GLTSLYRWNNEVKS<br>EYLLLVKTTTHAFPKLKE<br>RVKALHRYTVPEIVALPI<br>AEGNREYLDWLRENTK<br>GSHHHHHH    | MSQAIGILELTSIAKGMEL<br>GDAMLKSANVDLLVSKTI<br>SPGKFLMLGGDIGAIQQ<br>AIETGREQAGEMLVDSL<br>LEDVHPSVLP AISGLNSV<br>DKRQAVGIVETWSVAACI<br>RAANVALASSDVT LVRV<br>HMAFGIGGKCYM VVAGD<br>VGSVRRAVEAAAIEAGS<br>RGLLVYRSVIPRPHEAM<br>WRQMVEG | 12.7 | 19.3 |
| T33-11.3 | MEEVVLITVPSLHEAYVI<br>AATLVRERLAACVNIVP<br>GLTSLYRWDGVVVKVER<br>EYLLLVKTTTHAFPKLKE<br>RVKALHSYTVPEIVALPI<br>AEGNREYLDWLRENTK<br>GSHHHHHH | MSQAIGILELTSIAKGMEL<br>GDAMLKSANVDLLVSKTI<br>SPGKFLMLGGDIGAIQQ<br>AIETGREQAGEMLVDSL<br>LENIHPSVLP AISGLNSVD<br>KRQAVGIVETWSVAACIR<br>AANVALAGSNVT LVRVH<br>MAFGIGGKCYM VVAGDV<br>AEVEEAVALASEVAGRR<br>GLLVYRSVIPRPHEAMW<br>RQMVEG | 12.7 | 19.3 |
| T33-12.1 | MILVYSTFPNLIEAVRIGI<br>KLEKRLIACFNAPITA<br>AYWWKGEIRIDRETAI<br>FKTTEEKEKELYEELRK<br>LHPYETPAIFTLKVENVL<br>TEYMNWLRESVKGSHH<br>HHHH       | MVYMYVVSQDSLTPPEAK<br>QAVADAIVDAHRSLTGTQ<br>HFLAQVNFQEQPAGNVF<br>LGGVQQGGYTIFVHGLH<br>REGRSADLKGQLAEDIIL<br>LVSAAANIDPKHIWVYFG<br>EMPAQQMVEYGRS                                                                                   | 13.0 | 12.9 |
| T33-12.2 | MILVYSTFPDLITAATIGI<br>KLEKRLIACFNTPITA<br>VYWWKGEIRVDRETAI<br>FKTTEEKEKELYEELRK<br>LHPYETPAIFTLKVENVL<br>TEYMNWLRESVKGSHH<br>HHHH       | MVYMYVVSQDFLTPEAK<br>AAVARAITDAHRALTGTQ<br>HFLAQVNFQEQPAGNVF<br>LGGVQQGGYTIFVHGLH<br>REGRSADLKGQLARDIIL<br>LVSVAANIDEKHIWVYFG<br>EMPAQQMVEYGRE                                                                                    | 12.9 | 13.1 |
| T33-13.1 | MHNFIYITASSAEEAVEI<br>AVRILLEKKLAACVNLYPI<br>VELFWWEGRIRAEQEV<br>AMIVKTRSEKFAEVRDE<br>VKAMHSYTTPCICAIPIE<br>RGLKEFLDWIDETVE              | MVRGIRGAI TVKRNTPLAI<br>YASTVALLREMLEANGIQ<br>SYEELAAVIFTVTEDLTAA<br>SPADAARAIGMHRVPLLS<br>AREVPVPGSLKNVIRVLA<br>LWNTDTPQDRVRHVYLG<br>EAVRLRPDLESPGSHH<br>HHH                                                                     | 11.8 | 14.2 |
| T33-13.2 | MHNFIYITAKSGVEAVGI<br>AYRILLEKKLAACVNLYPI                                                                                                | MVRGIRGAI TVGRDTPLA<br>ISAATIALLEKMLEANGIQ                                                                                                                                                                                        | 11.7 | 14.1 |

|          |                                                                                                                                                                                                      |                                                                                                                                                                                                                                     |      |      |
|----------|------------------------------------------------------------------------------------------------------------------------------------------------------------------------------------------------------|-------------------------------------------------------------------------------------------------------------------------------------------------------------------------------------------------------------------------------------|------|------|
|          | VELFWWEGRVHAETEVE<br>AMIVKTRSEKFAEVRDE<br>VKAMHSYTTPCICAIPIE<br>RGLKEFLDWIDETVN                                                                                                                      | SYEELAAVIFTVTEDLTAA<br>DPADAARAIGMHRVPLLS<br>AREVPVPGSLKNVIRVLA<br>LWNTDTPQDRVRHVYLS<br>EAVRLRPDLESPGSHHH<br>HHH                                                                                                                    |      |      |
| T33-13.3 | MHNFYITADSGIEAVAIA<br>MRLLEKKLAACVNIYPIV<br>ELFWWEGEIRVRQETA<br>MIVKTRSEKFAEVRDEV<br>KAMHSYTTPCICAIPIER<br>GLKEFLDWIDETVY                                                                            | MVRGIRGAITVARDTEIEI<br>AAATMVLLKRMLKANGIQ<br>SYEELAAVIFTVTEDLTAA<br>NPADAARAIGMHRVPLLS<br>AREVPVPGSLKNVIRVLA<br>LWNTDTPQDRVRHVYLD<br>EAVRLRPDLESPGSHHH<br>HHH                                                                       | 11.9 | 14.2 |
| T33-14.1 | MKIRIGHGFDVHKFGEP<br>RPLILCGVEVPYETGLV<br>AHSDDGVVLHAISDAILG<br>AMALGDIGKHFPDTPDAA<br>YKGADSIDLLRECVELA<br>RAKGFELGNLDVTIIAQA<br>PKMAPYIKLMQLNLSIVL<br>DADIADINVKATTTEKLG<br>FTGRKEGIAVEAVVLLS<br>RK | MSEKKAVIGVVTISDRAS<br>KGIYKDYSGEAIIYLKTVI<br>ITPFEVEYRVIPDERDLIE<br>KTLIELADEKGCSLILTTG<br>GTGPAPRDVTPEATEAV<br>CEKMLPGFGELMRQVSL<br>KQVPTAILSRQTAGIRGS<br>CLIVNLPDGPESILLCLKA<br>VMPAIPYCIDLIGGAYIDT<br>DPRIVKAFRPKPGSHHH<br>HHH   | 17.0 | 20.3 |
| T33-14.2 | MKIRIGHGFDVHKFGEP<br>RPLILCGVEVPYETGLV<br>AHSDDGVVLHAISDAILG<br>AMALGDIGKHFPDTPDAA<br>YKGADSLDLLRHCIDLA<br>RAKGFELGNLDVTIIAQA<br>PKMAPYIKLMQLNLSVL<br>LDADIADINVKATTTEKL<br>GFTGRKEGIAVEAVVLL<br>SRK | MSEKKAVIGVVTISDRAS<br>KGIYKDYSGLTIINLLKTVII<br>TPFEVEYRVIPDERDLIEK<br>TLIELADEKGCSLILTTGG<br>TGPAPRDVTPEATEAVC<br>EKMLPGFGELMRQVSLK<br>QVPTAILSRQTAGIRGSC<br>LIVNLPDGPESIVICLKAV<br>MPAIPYCIDLIGGAYIDTD<br>PRIVKAFRPKPGSHHHH<br>HH* | 17.0 | 20.2 |
| T33-14.3 | MKIRIGHGFDVHKFGEP<br>RPLILCGVEVPYETGLV<br>AHSDDGVVLHAISDAILG<br>AMALGDIGKHFPDTPDAA<br>YKGADSLDLLRECIDLA<br>RAKGFELGNLDVTIIAQA<br>PKMAPYIKLMQLNLSVL<br>LDADAADINVKATTTEKL<br>GFTGRKEGIAVEAVVLL<br>SRK | MSEKKAVIGVVTISDRAS<br>KGIYKDYSGEAIIILLKTTII<br>TPFEVEYRVIPDERDLIEK<br>TLIELADEKGCSLILTTGG<br>TGPAPRDVTPEATEAVC<br>EKMLPGFGELMRQVSLK<br>QVPTAILSRQTAGIRGSC<br>LIVNLPGDIDSIVLCLKAV<br>MPAIPYCIDLIGGAYIDTD<br>PRIVKAFRPKPGSHHHH<br>HH  | 17.0 | 20.2 |
| T33-15.1 | MVRGIRGAVSVLEDTRL<br>VISHATRLLLRLMLKAN<br>GIQSYEELAAVIFTVTED<br>LTSAFPAAARRIGMHR<br>VPLLSAREVPVPGSLPR<br>VIRVLALWNTDTPQDRV<br>RHVYLD DAVRLRPDLES                                                     | MSKAKIGIVTVSDRASAGI<br>EEDVSGQAIIDWLKAYLT<br>SEWEPIYQVIPDEQDVIE<br>TTLIKMADEQDCCLIVTT<br>GGTGPAPRDVTPEATEA<br>VCDRMMPGFGELMRATL<br>LRFNPTAILSRQTAGLRG                                                                               | 14.5 | 19   |



|          |                                                                                                                                      |                                                                                                                                                   |      |      |
|----------|--------------------------------------------------------------------------------------------------------------------------------------|---------------------------------------------------------------------------------------------------------------------------------------------------|------|------|
|          | PGSHHHHHH                                                                                                                            | DSLIVNLPGAPDSIILCLE<br>AVFPAIPYCIDLMEGPYL<br>ECDESVLKPFRRP                                                                                        |      |      |
| T33-16.1 | MSLILVYSTFPNRTEAVT<br>IGVKLLKKRLIACFNAPFI<br>VSAYEEDGVIELKEEWA<br>AIFKTTEEKEKELYEELR<br>KLHPYETPAIFTLKVENV<br>LTEYMNWLRESV           | MPVIQTFVSTPLDKEKRE<br>ALALEYRVITETVLGKDP<br>ALVMMTFHDSTPMFFNG<br>NTDPVACVRVEALGGYG<br>PSEPEKVTRLVTKAITDIC<br>GIVADRIFVLYFSPLHCG<br>WNGTNLGSHHHHHH | 12.0 | 13.4 |
| T33-16.2 | MSLILVYSTFPNLHEAVV<br>IGVELLRKRLIACFNAPFI<br>VSVYEEEDGVIVVREEWA<br>AIFKTTEEKEKELYEELR<br>KLHPYETPAIFTLKVENV<br>LTEYMNWLRESI          | MPVIQTFVSTPLDEEKRE<br>ALALQYRVVITYTILKKEP<br>DLVMMTFHDSTPMRFRG<br>STAPVACVRVEALGGYG<br>PSEPERVTRVVTAITAV<br>CGIVADRIFVLYFSPLHC<br>GWNGTNLGSHHHHHH | 12.0 | 13.5 |
| T33-17.1 | MSLILVYSTFPDLVSAIAI<br>GIKLLKRLIACFNAPFIT<br>SVYWWKGEIRVEKETA<br>AIFKTTEEKEKELYEELR<br>KLHPYETPAIFTLKVENV<br>LTEYMNWLRESVGS<br>HHH   | MVYMYVVSQGRLTPEQK<br>AAVARAIVDAHRALTGTQ<br>HFLAQVNFQECPKGNVF<br>LGGKRQDGNTIFVHGLH<br>REGRSADLKGQLARDIIL<br>LVSAAADIPEKHIWVYFG<br>EMPAQQMVEYGRE    | 13.0 | 13.2 |
| T33-17.2 | MSLILVYSTFPSTLAEVA<br>IGIELIEKRLIACFNAPFIT<br>SVYWWKGEIRVERETA<br>AIFKTTEEKEKELYEELR<br>KLHPYETPAIFTLKVENV<br>LTEYMNWLRESVGS<br>HHH  | MVYMYVVSQGGLSPEQ<br>KAAVADAIVQAHRRLTGT<br>QHFLAQVNFQECPKGNV<br>FLGGVRQDGNTIFVHGL<br>HREGRSADLKGQLAHDII<br>LLVSAAANIPEKHIWVYF<br>GEMPAQQMVEYGRA    | 13.0 | 13.1 |
| T33-17.3 | MSLILVYSTFPNRVTAIAI<br>GLKLIKRLIACFNAPFIT<br>TVYWWKGEIRVERETA<br>AIFKTTEEKEKELYEELR<br>KLHPYETPAIFTLKVENV<br>LTEYMNWLRESVGS<br>HHH   | MVYMYVVSQGYLTPQQK<br>ADVAAAIVTAHRDLTGTQ<br>HFLAQVNFQECPKGNVF<br>LGGVRQDGNTIFVHGLH<br>REGRSADLKGQLARDIIL<br>LVSAAANIPEKHIWVYFG<br>EMPAQQMVEYGRS    | 13.1 | 13.1 |
| T33-18.1 | MSLILVYSTFPNRLEALLI<br>GLELLEKRLIACFNAFEI<br>TSAYWEKGRIRIEREWA<br>AIFKTTEEKEKELYEELR<br>KLHPYETPAIFTLKVENV<br>LTEYMNWLRESVGS<br>HHH  | MVYMYVVSQDRLTPSAK<br>HAVAQAITDAHLAHTGEE<br>HTLAQVNFQECPAGNVF<br>LGGVQQGGDTIFVHGLH<br>REGRSDELKRDLITDIQV<br>LVSHAANIDPKHIWVYFG<br>EMPASQMVEYGGL    | 13.2 | 13   |
| T33-18.2 | MSLILVYSTFPNLLAEKLI<br>GLKLLKKRLIACFNAFEI<br>TSAYWEKGRIRTRREW<br>AAIFKTTEEKEKELYEEL<br>RKLHPYETPAIFTLKVEN<br>VLTEYMNWLRESVGS<br>HHHH | MVYMYVVSQDRLTPSAK<br>HAVAQAITDAHLTHTGEE<br>HSLAQVNFQECPAGNVF<br>LGGVQQGGDTIFVHGLH<br>REGRSDELKQRLITDIIAK<br>VSIAADIDPKHIWVYFGE<br>MPASQMVEYGGL    | 13.2 | 13   |

|          |                                                                                                                                                                                       |                                                                                                                                                              |      |      |
|----------|---------------------------------------------------------------------------------------------------------------------------------------------------------------------------------------|--------------------------------------------------------------------------------------------------------------------------------------------------------------|------|------|
| T33-18.3 | MSLILVYSTFPNLEALYI<br>GLLLLDKRLIACFNAFEI<br>VSAAYWEKGRIRIRREWA<br>AIFKTTEEKEKELYEELR<br>KLHPYETPAIFTLKVENV<br>LTEYMNWLRRESVGS<br>HHHH                                                 | MVYMYVVSQDRLTPSAK<br>HDVARAITDAHLAFTGEE<br>HRLAQVNFQEQPAGNVF<br>LGGVQQGGDTIFVHGLH<br>REGRSDELKRDLITAIH<br>VSLAANIDPKHIWVYFGE<br>MPRVQMMMEYGGL                | 13.2 | 13.2 |
| T33-19.1 | MDSPIIEANGTDELTSF<br>IGEAKHYVDEEMKGILE<br>EIQNDIYKIMGEIGSRGKI<br>EGISPERLRWLLDLIDRY<br>SEMVKKENVLPGGTLES<br>AKLDVCRTIAERAARKV<br>KTVVEEKGIGETALHYL<br>EVLSELLARVIEIEKN<br>KEGSHHHHHH  | MKKIIETQRAPGAIGPYV<br>QGVDLGSMVFTSGQIPV<br>PKTGKIPSTIAEQARLSLE<br>NVKAIVVAAGLSVGDIIKM<br>TVFITDLSLPLIELVYER<br>FFDEHQATYPTRSCVQV<br>ARLPKDVKLEIEAIAVRD       | 17.2 | 13.8 |
| T33-19.2 | MDSPIIEANGTDELTSF<br>IGEAKHYVDEEMKGILE<br>EIQNDIYKIMGEIGSRGKI<br>EGISEERLLFLLDLIDRY<br>SEMVPLSGVLPGGTLES<br>AKLDVCRTIAERAARKV<br>KTVVEETGIGIVALRYL<br>EVLSELLARVIEIEKN<br>KEGSHHHHHH  | MKKIIETQRAPGAIGPYV<br>QGVDLGSMVFTSGQIPV<br>PETGEIPEHVYEQARLSL<br>ENVKAIVVAAGLSVGDIIKM<br>MTVFITDSSDLPIELVYK<br>RFFDEHQATYPTRSCVQ<br>VARLPKDVKLEIEAIAVRP      | 17.0 | 14.0 |
| T33-19.3 | MDSPIIEANGTDELTSF<br>IGEAKHYVDEEMKGILE<br>EIQNDIYKIMGEIGSRGKI<br>EGISEERLDELDDLYNR<br>YSEMVPRDNVLPGGTL<br>ESAKLDVCRTIAERAAR<br>KVKTVEETGIGRVALQ<br>YLEVLSLLELLARVIEIE<br>KNKEGSHHHHHH | MKKIIETQRAPGAIGPYV<br>QGVDLGSMVFTSGQIPV<br>PETGRIPAHVAEQARLSL<br>ENVKAIVVAAGLSVGDIIKM<br>MTVFITDLEDLPLIEAVYK<br>RFFDSHQATYPTRSCVQ<br>VARLPKDVKLEIEAIAVRE     | 17.2 | 13.8 |
| T33-20.1 | MSPIEEANGTDELTSFI<br>GEAKHYVDEEMKGILEE<br>IQNDIYKIMGEIGSKGKIP<br>GIPQRSRLDWLLDLIERK<br>EMVNRKFVLPGGTLESA<br>KLDVCRTIARRATRQVL<br>KVVEEFGIGRVAVQYLL<br>VLVELLFLARVIEIEKNK<br>EGSHHHHHH | MLYFQGMPHLVIEATANL<br>RLETSPGELLEQANAALF<br>DSGQFGEADIKSRFVTLE<br>AYRQGTAAVERAYLHAC<br>LSILDGRSVLERTRLALRL<br>RAVLAVAGGGGEEGVQ<br>VSVEVREMERISYAKAVV<br>AR   | 17.2 | 13.8 |
| T33-20.2 | MKPIEEANGTDELTSFI<br>GEAKHYVDEEMKGILEE<br>IQNDIYKIMGEIGSKGKIP<br>GIPESRLEWLLSLIARYS<br>EMVNREFVLPGGTLESA<br>KLDVCRTIARRAARKVQ<br>EVLEEFGIGDVALKYLLV<br>LVELLFLARVIEIEKNKE<br>GSHHHHHH | MLYFQGMPHLVIEATANL<br>RLETSPGELLEQANAALF<br>ASGQFGEADIKSRFVTLE<br>AYRQGTAAVERAYLHAC<br>LSILDGRSAETRLRLSIRL<br>CAVLASAVAGGGGEEGVQ<br>VSVEVREMERISYAKAVV<br>AP | 17.1 | 13.7 |
| T33-20.3 | MEPIEEANGTDELTSFI                                                                                                                                                                     | MLYFQGMPHLVIEATANL                                                                                                                                           | 17.2 | 13.7 |

|          |                                                                                                                                                                                        |                                                                                                                                                                                                                                    |      |      |
|----------|----------------------------------------------------------------------------------------------------------------------------------------------------------------------------------------|------------------------------------------------------------------------------------------------------------------------------------------------------------------------------------------------------------------------------------|------|------|
|          | GEAKHYVDEEMKGILEE<br>IQNDIYKIMGEIGSKGKIP<br>GISEDRLDWLLDLIDRYK<br>EMVNRKFLVLPGGTLESA<br>KLDVCRTIARRAARKVL<br>KVLEEFVIGDVALKYL<br>LEELLFLLARVIEIEKNKE<br>GSHHHHHH                       | RLETSPGELLEQANAALF<br>DSGQFGEADIKSRFVTLE<br>AYRQGTAAVERAYLHAC<br>LSILDGRSTETRLRLSLRL<br>LAVLAGAVAGGGEVQ<br>VSVEVREMERISYAKAVV<br>AA                                                                                                |      |      |
| T33-21.1 | MDSPIIEANGTDELTSF<br>IGEAKHYVDEEMKGILE<br>EIQNDIYKIMGEIGSKGKI<br>PGIPQSSRLRWDLIKR<br>YSEMVNKSFVLPGGTLE<br>SAKLDVCRTIARRAARK<br>VATVVEEFGIGVALAY<br>LDVLSSELLFLLARVIEIEK<br>NKEGSHHHHHH | MLDFQGMPLVIEATANL<br>RLETSPGELLEQANAALF<br>ASGQFGEADIKSRFVTLE<br>AYRQGTAAVERAYLHAC<br>LSILDGRSIGELRALGARL<br>CAVLAAVAGGGEVQ<br>VSVEVREMERLSYAKRV<br>VAA                                                                            | 16.9 | 13.5 |
| T33-21.2 | MDSPIIEANGTDELTSF<br>IGEAKHYVDEEMKGILE<br>EIQNDIYKIMGEIGSKGKI<br>PGISEESLVKLFDLIKRY<br>SEMVNKSFVLPGGTLES<br>AKLDVCRTIARRAARKV<br>ATVVEEFGIGAVALAYLE<br>LSELLFLLARVIEIEKNK<br>EGSHHHHHH | MLDFQGMPLVIEATANL<br>RLETSPGELLEQANRALF<br>DSGQFGEADIKSRFVTLE<br>AYRQGTAAVERAYLHAC<br>LSILDGRDIGTRTALAARL<br>LAVLAGAVAGGGEVQ<br>VSVEVREMERLSYAKRV<br>VAA                                                                           | 16.9 | 13.6 |
| T33-21.3 | MDSPIIEANGTDELTSF<br>IGEAKHYVDEEMKGILE<br>EIQNDIYKIMGEIGSKGKI<br>PGISYESIARLFDLIRRY<br>KEMVNKSFVLPGGTLES<br>AKLDVCRTIARRAARKV<br>ATVLEEFVIGAVALAYLE<br>LSELLFLLARVIEIEKNK<br>EGSHHHHHH | MLDFQGMPLVIEATANL<br>RLETSPGELLEQANAALF<br>DSGQFGEADIKSRFVTLE<br>AYRQGTAAVERAYLHAC<br>LSILDGRSTGELTALAAR<br>LCAVLAVAGGGEVQ<br>QVSVEVREMERLSYAKR<br>VVAA                                                                            | 17.1 | 13.5 |
| T33-22.1 | MDSPIIEANGTDELTSF<br>IGEAKHYVDEEMKGILE<br>EIQNDIYKIMGEIGSKGKI<br>EGISEDRLADLLELLRY<br>SAMVNKSFVLPGGTLES<br>AKLDVCRTIARRAERKV<br>ATVLEEFVIGKVALRYL<br>RVLERLLFLLARVIEIEKN<br>KEGSHHHHHH | MSQAIGILELTSIAKGMEL<br>GDAMLKSANVDLLVSKTI<br>SPGKFLMLGGDYGAIQ<br>QAIETGTSQAGEMLVDS<br>ELLKNIHPSVLP AISGLNS<br>VDKRQAVGIVETWGVTA<br>CIVAADFAVKNSNVT LVR<br>VHMAFGIGGKCYMVVAG<br>DVSDVNNAV DVASAVAG<br>ALGKLVYRSVIPRPHEAM<br>WRQMVEG | 17.2 | 19.2 |
| T33-22.2 | MDSPIIEANGTDELTSF<br>IGEAKHYVDEEMKGILE<br>EIQNDIYKIMGEIGSKGKI<br>EGISEERLVDLLELLRY<br>SKMVNKSFLVLPGGTLES<br>AKLDVCRTIARRAERKV<br>ATVLEEFVIGKVALRYL<br>RVLERLLFLLARVIEIEKN              | MSQAIGILELTSIAKGMEL<br>GDAMLKSANVDLLVSKTI<br>SPGKFLMLGGDYGAIQ<br>QAIETGTSQAGEMLVDS<br>ALLKDIHPSVLP AISGLNS<br>VDKRQAVGIVETWGVTA<br>CIIAADFAVKNSNVT LVR<br>VHMAFGIGGKCYMVVAG                                                        | 17.3 | 19.2 |

|          |                                                                                                                                                                                          |                                                                                                                                                                                                                                   |      |      |
|----------|------------------------------------------------------------------------------------------------------------------------------------------------------------------------------------------|-----------------------------------------------------------------------------------------------------------------------------------------------------------------------------------------------------------------------------------|------|------|
|          | KEGSHHHHHH                                                                                                                                                                               | DVSDVNNAVEVASAVAG<br>ALGRLVYRSVIPRPHEAM<br>WRQMVEG                                                                                                                                                                                |      |      |
| T33-22.3 | MDSPIIEANGTDELTSF<br>IGEAKHYVDEEMKGILE<br>EIQNDIYKIMGEIGSKGKI<br>EGISED RVAYLLELLRY<br>EKMVNKSFVLPGGTLES<br>AKLDVCRTIARRAERKV<br>ATVLRREFGIGKVALRYLK<br>VLERLLFLLARVIEIEKN<br>EGSHHHHHH  | MSQAIGILELTSIAKGMEL<br>GDAMLKSANVDLLVSKTI<br>SPGKFLMLGGDTGAIQ<br>QAIETGTSQAGEMLVDS<br>DLIKDIHPSVLP AISGLNS<br>VDKRQAVGIVETWGVTA<br>CIIAADFAVKGSNVT LVR<br>VHMAFGIGGKCYMVVAG<br>DVSDVNNAVDVASRVAG<br>ALGLLVYRSVIPRPHEAM<br>WRQMVEG | 17.3 | 19.2 |
| T33-23.1 | MDSPIIEANGTDELTSF<br>IGEAKHYVDEEMKGILE<br>EIQNDIYKIMGEIGSKGKI<br>PGISSYVWLVLIRRY<br>EEMVNKSFVLPGGTLES<br>AKLDVCRTIARRAHRKV<br>KTVVEEFGIGEDAAAYL<br>ELLSRLLFLLARVIEIEKN<br>KEGSHHHHHH     | MSQAIGILELTSIAKGMEL<br>GDAMLKSANVDLLVSKTI<br>SPGKFLMLGGDIGAIQQ<br>AIETGTSQAGEMLVDSL<br>IPDIHPSVLP AISGLNSVD<br>KRQAVGIVETWSVVACIR<br>AANA AVASSNVT LVRVH<br>MAFGIGGKCYMVVAGDV<br>SDVNEAVTVASAVAGAT<br>GLLVYRSVIPRPHEAMW<br>RQMVEG | 17.1 | 19   |
| T33-23.2 | MDSPIIEANGTDELTSF<br>IGEAKHYVDEEMKGILE<br>EIQNDIYKIMGEIGSKGKI<br>PGIPWESLLWLRDLIKR<br>YEEMVNKSFVLPGGTLE<br>SAKLDVCRTIARRAYRK<br>VKT VVEEFGIGEVAVQY<br>LRELSRLLFLLARVIEIEK<br>NKEGSHHHHHH | MSQAIGILELTSIAKGMEL<br>GDAMLKSANVDLLVSKTI<br>SPGKFLMLGGDIGAIQQ<br>AIETGTSQAGEMLVDSL<br>LPDIHPSVLP AISGLNSVD<br>KRQAVGIVETWSVEACIR<br>AADMAVRTSNVT LVRVH<br>MAFGIGGKCYMVVAGDV<br>SDVNEAVTAASATAGAL<br>GKLVYRSVIPRPHEAMW<br>RQMVEG  | 17.5 | 19.2 |
| T33-23.3 | MDSPIIEANGTDELTSF<br>IGEAKHYVDEEMKGILE<br>EIQNDIYKIMGEIGSKGKI<br>PGIPLSSYIWLLELIRRY<br>EEMVNKSFVLPGGTLES<br>AKLDVCRTIARRAFRKV<br>RTVVEEFGIGEVAAVYL<br>RVLSELLFLLARVIEIEKN<br>KEGSHHHHHH  | MSQAIGILELTSIAKGMEL<br>GDAMLKSANVDLLVSKTI<br>SPGKFLMLGGDIGAIQQ<br>AIETGTSQAGEMLVDSL<br>IPDIHPSVLP AISGLNSVD<br>KRQAVGIVETWSVTACII<br>AANA AVAGSNVT LVRVH<br>MAFGIGGKCYMVVAGDV<br>SDVNEAVTVASLTAGAL<br>GRLVYRSVIPRPHEAMW<br>RQMVEG | 17.3 | 19.1 |
| T33-24.1 | MPLLKFDLFYGRSDEQI<br>KSLIDAHAAMVLAFGV<br>APTDRYQTVSQHREGE<br>MVLED TGLGYGRTEAV<br>VLLTVISRPRSEEQK VLF<br>NRLLVAALESVCGISPD<br>DVIVALVENSADWSFG                                           | MSKAKIGIVTVSDRAYAGI<br>YEDISGKAIIDTLNDY LTS<br>EWEPIYRVIPDNLEQIKVA<br>LGYMALIEDCCLIVTTGG<br>TGPAKRDTVPEATEAVC<br>DRMMPGF GELMRAESLK<br>FVPTAILS RQTAGLLGDS                                                                        | 15.2 | 19   |

|          |                                                                                                                                                                          |                                                                                                                                                                                                                    |      |      |
|----------|--------------------------------------------------------------------------------------------------------------------------------------------------------------------------|--------------------------------------------------------------------------------------------------------------------------------------------------------------------------------------------------------------------|------|------|
|          | GGRAEFLTGDLVGGSH<br>HHHHH                                                                                                                                                | LIVNLPGKPKSIRECLDAV<br>FPAIPYCIDLMEGPYLEC<br>NEAVIKPFRP                                                                                                                                                            |      |      |
| T33-24.2 | MPLLKFDLFYGRSDEQI<br>KSLIDAAWAAMVLAFGV<br>PATDRYQTVSQHREG<br>MVLEDTGLGYGRTRAV<br>VLLTVISRPRSEEQKVL<br>NRLLCAALEVVCGISPD<br>DVIVALVENSADWSFG<br>RGRAEFLTGDLVGGSH<br>HHHHH | MSKAKIGIVTVSDRAFAGI<br>YEDISGKAIIDTLNDYLTS<br>EWEPIYRVIPDELGLIEAA<br>LAYMALVEDCCLIVTTGG<br>TGPAKRDTVPEATERVC<br>DRMMPGFGELMRAESLK<br>FVPTAILSRQTAGLLGDS<br>LIVNLPGKPKSIRECLDAV<br>FPAIPYCIDLMEGPYLEC<br>NEAVIKPFRP | 15.4 | 19.0 |
| T33-24.3 | MPLLKFDLFYGRSDEQI<br>KSLIDAAGAMVLAFGV<br>PASDRYQTVSQHRPGE<br>MVLEDTGLGYGRTRAV<br>VLLTVISRPRSEEQKVL<br>NRLLTAALEVLCGISPDD<br>VIVALVENSADWSFGG<br>GRAEFLTGDLVGGSHH<br>HHHH | MSKAKIGIVTVSDRAFAGI<br>YEDISGKAIIDTLNDYLTS<br>EWEPIYRVVPDDKDIIVTT<br>LAYMALIEDCCLIVTTGGT<br>GPAKRDTVPEATEAVCD<br>RMMPGFGELMRAESLKF<br>VPTAILSRQTAGLLGDSLI<br>VNLPGKPKSIRECLDAVF<br>PAIPYCIDLMEGPYLECN<br>EAVIKPFRP | 15.2 | 19.0 |
| T33-25.1 | MSRVYLIFSTCPDLPSA<br>EISRVLVQERLAACVTQ<br>LPGAVSTYRWQGGKIETT<br>QEIQLLIKTNRKTVALAM<br>LKLKDLHPYRLPETIAVQ<br>VSTGYPRFEKWIEDEIE                                            | MSRTMVSSGSLFEEIFGY<br>SRAVRIGPLVVVAGTTGS<br>GSTIGAQTLDALRRIEIAL<br>GQAGATLADVVRTRIYVT<br>DISLYDVVGMAYDAFRKI<br>RPVTSMVEVTALIAPGLL<br>VEIEADAYGGSHHHHHH                                                             | 12.0 | 13.6 |
| T33-25.2 | MSSVYLIFSTCPDLPSA<br>EISRVLVQERLAACVTQ<br>LPGAVSTYRWQGGKIETT<br>QEIQLLIKTNRRTVSLAIL<br>KLQDLHPYRLPETIAVQ<br>VSTAYPEFEKWIYDEIE                                            | MSRTMVSSGSLLEEVTG<br>YSRAVRIGPLVVVAGTTG<br>SGKDIGAQTLDALRRIEIA<br>LGQAGATLADVVRTRIYV<br>TDIRFDDVALAINRAFR<br>KIRPVTSMVEVTALIAPGL<br>LVEIEADAYGGSHHHHH<br>H                                                         | 12.0 | 13.5 |
| T33-25.3 | MSNVYLIFSTCPDLPSA<br>EISRVLVQERLAACVTQ<br>LPGAVSTYRWQGGKIETT<br>QEIQLLIKTNRDTIVRAIL<br>KLKELHPYRLPETIAVQV<br>ATAYAGFEKWIWDEIA                                            | MSRTMVSSGSLLEERLG<br>YSRAVRIGPLVVVAGTTG<br>SGDTIGMQTLDALRRIEIA<br>LGQAGATLADVVRTRIYV<br>TDIRIDVGLAIAEAFGK<br>IRPVTSMVEVTALIAPGLL<br>VEIEADAYGGSHHHHHH                                                              | 11.9 | 13.4 |
| T33-26.1 | MKSELEKMLAGHLYNP<br>ADPELQDLVLLARRLVD<br>HYNRTSADEYKERQTL<br>RALFGSTGERLFIENF<br>RCDYGENIHVGENFFM<br>NFDGVILDVCEVRIGDH<br>CFIGPGVHIYTATHPLDP<br>HERNSGLEYGKPVVIGH        | MPVIQTFVSTPLDERTRS<br>LLAAVYARVTREVLGKDP<br>TRVMMTFHDSTPMHHK<br>GSTAPVACVRVEALGGY<br>GPSEPEKVTIVTRAITDL<br>CGIVADRIFVLYFSPLHC<br>GWNGTNV                                                                           | 21.3 | 12.4 |

|          |                                                                                                                                                                                                                                              |                                                                                                                                                                                                                                        |      |      |
|----------|----------------------------------------------------------------------------------------------------------------------------------------------------------------------------------------------------------------------------------------------|----------------------------------------------------------------------------------------------------------------------------------------------------------------------------------------------------------------------------------------|------|------|
|          | NVWIGGRAVINPGVTIG<br>DNAVIASGAVVTKDVPA<br>NAVVGGNPAKVIKWLK<br>GSHHHHHH                                                                                                                                                                       |                                                                                                                                                                                                                                        |      |      |
| T33-26.2 | MKSELEKMLAGHLYNP<br>ADPELQDLRLLARRLVD<br>AYNETSADEYEERKLLL<br>DTLFGSTGERLFIENF<br>RCDYGDNIHVGENFFM<br>NFDGVILDVCEVRIGDH<br>CFIGPGVHIYTATHPLDP<br>HERNSGLEYGKPVVIGH<br>NVWIGGRAVINPGVTIG<br>DNAVIASGAVVTKDVPA<br>NAVVGGNPAKVIKWLK<br>GSHHHHHH | MPVIQTFVSTPLDERDRL<br>LLAAVYARVTEKVLGKDP<br>SKVMMTFHDSTPMHHR<br>GSTAPVACVRVEALGGY<br>GPSEPEKVTIVTDAITEV<br>CGIVADRIFVLYFSPLHC<br>GWNGTNV                                                                                               | 21.3 | 12.3 |
| T33-26.3 | MKSEKEKMLAGHLYNP<br>ADKELQNELLTARRLVD<br>LYNETGADEYDERRVLL<br>RTLFGSTGERLFIENF<br>RCDYGRNIHVGENFFM<br>NFDGVILDVCEVRIGDH<br>CFIGPGVHIYTATHPLDP<br>HERNSGLEYGKPVVIGH<br>NVWIGGRAVINPGVTIG<br>DNAVIASGAVVTKDVPA<br>NAVVGGNPAKVIKWLK<br>GSHHHHHH | MPVIQTFVSTPLDERERT<br>LLAAVYARVTREVLGKPS<br>EKVMMTFHDSTPMHHR<br>GSTAPVACVRVEALGGY<br>GPSEPEKVTIVTAAITDV<br>CGIVADRIFVLYFSPLHC<br>GWNGTNV                                                                                               | 21.3 | 12.3 |
| T33-27.1 | MTMADETIILNVLGQYT<br>RAHRRDPDAMAALFA<br>PDASIVVDAVGGASKPI<br>SVLHGRDAIRVAVRQM<br>MAPHGYRAWSQNVVN<br>APVIHIGDTARLDAQF<br>MVFSILAAEVPDGGWPT<br>GTFGAQGRIVPIEAGTY<br>TLFLRTVPDGVVIAHMY<br>IKHRLPMAFG                                            | MSQAIGILELSSIAKGMEL<br>GDAMLKAANVDLLVSKTI<br>SPGKFLMLGGDLDDIILA<br>VAVGMERAGDSDLSEVI<br>PDIHPSVLPASGLNSVD<br>KRQAVGIVETWSVAACIK<br>AADRAVKGSNVTLVRVH<br>MAFGIGGKCYMVVAGDV<br>SDVNNAVTVASESAGEK<br>GLLVYRSVIPRPHEAMW<br>RQMVEGGSHHHHHH  | 17.3 | 20.2 |
| T33-27.2 | MTMADETIILNVLGQYT<br>RAHRRDPDAMAALFA<br>PDATIVVDAVGGANRRII<br>SLLDGRDAIRVAVRQM<br>MAPHGYRAWSQNVVN<br>APVIHINGDKALLDAQF<br>MVFSILAAEVPDGGWPT<br>GTFGAQGRIVPIEAGEY<br>LLMLETVPDGVVISMII<br>KHRLPMAFG                                           | MSQAIGILVLSSIAKGMEL<br>GDAMLKAANVDLLVSKTI<br>SPGKFLMLGGDESAIKQ<br>AVAVGVERAGDALLDSA<br>VISDIHPSVLPASGLNSV<br>DKRQAVGIVETWSVAACI<br>EAADRAVKGSNVTLVRV<br>HMAFGIGGKCYMVVAGDV<br>VSDVNNAVTVASESAGE<br>KLLVYRSVIPRPHEAM<br>WRQMVEGGSHHHHHH | 17.3 | 20.0 |
| T33_27.3 | MTMADETIILNVLGQYT<br>RAHRRDPDAMAALFA<br>PDATIVVDAVGGAFRVI<br>SILKGRDAIRVAVRQMM                                                                                                                                                               | MSQAIGILVLSSIAKGMEL<br>GDAMLKAANVDLLVSKTI<br>SPGKFLMLGGDEGAIK<br>QAVAVGVRNAGDDLDS                                                                                                                                                      | 17.4 | 20.1 |

|          |                                                                                                                                                                                                  |                                                                                                                                                     |      |      |
|----------|--------------------------------------------------------------------------------------------------------------------------------------------------------------------------------------------------|-----------------------------------------------------------------------------------------------------------------------------------------------------|------|------|
|          | APHGYRAWSQNVVNP<br>VIHIKGDKALLDAQFMVF<br>SILAAEVPDGGWPTGTF<br>GAQGRIVPIEAGTYLLML<br>ETVEDGWVISRMIIEHRL<br>PMAFG                                                                                  | KVIDNIHPSVLP AISGLNS<br>VDKRQAVGIVETWSVAA<br>CIRAADRAVKGSNVT LVR<br>VHMAFGIGGKCYMVVAG<br>DVSDVNNAVTVASESAG<br>EKGLLVYRSVIPRPHEAM<br>WRQMVEGGSHHHHHH |      |      |
| T33-28.1 | MSVNTSFLSPSLVTIRDF<br>DHGQFAVLRIGRTGFPA<br>DKGDIDLCLSKMQGVLS<br>AQLFLGNPREPGFKGP<br>HIRIRCVDIDDKHTYNAM<br>VYVDLIVGTGASEVERE<br>TAEKARAALAVLRVD<br>EADHSCVTQFEMKLR<br>EELLSSDSFHPDKDEYY<br>KDFL   | MPVIQTFVSTPLDHEKRT<br>LLFRQYRIVTAVILGKPAE<br>LVMMTFHDSTPMHFFGS<br>TDPVACVRVEALGGYGP<br>SEPEKVTEVVTKAISYVC<br>GIVADRIFVLYFSPLHCG<br>WNGTNGSHHHHHH    | 17.6 | 13.5 |
| T33-28.2 | MSVNTSFLSPSLVTIRDF<br>DNGQFAVLRIGRTGFPA<br>DKGDIDLCLRKMEGVLA<br>AQIYLGNPREGPKGPH<br>IRIRCVDIDDKHTYNAMV<br>YVDLIVGTGASEVERET<br>AEELAKAALDIALEVDKA<br>NEHSCVTQFEMKLREEL<br>LSSDSFHPDKDEYYKDF<br>L | MPVIQTFVSTPLDHRKRE<br>MLSTVYRIVTATILGKPE<br>LVMMTFHDSTPMHFFGS<br>TDPVACVRVEALGGYGP<br>SEPEKVTKVVTEAISYLC<br>GIVADRIFVLYFSPLHCG<br>WNGTNIGSHHHHHH    | 17.6 | 13.5 |
| T33-28.3 | MSVNTSFLSPSLVTIRDF<br>DKGQFAVLRIGRTGFPA<br>DKGDIDLCLSKMDGVLA<br>AQLYLGNPREGPKGPH<br>HIRIRCVDIDDKHTYNAM<br>VYVDLIVGTGASEVERE<br>TAEERARRALAVLRVD<br>EADHSCVTQFEMKLR<br>EELLSSDSFHPDKDEYY<br>KDFL  | MPVIQTFVSTPLDHEKRN<br>MLTKVYRIVTDTILGKPAE<br>LVMMTFHDSTPMHFFGS<br>TDPVACVRVEALGGYGP<br>SEPEKVTKVVTD AISYVC<br>GIVADRIFVLYFSPLHCG<br>WNGTNLGSHHHHHH  | 17.7 | 13.5 |
| T33-29.1 | MSRTMVSSGSRYERIM<br>GYSRAVRIGPLVVVAGT<br>TGSGRGIGDQTEDALR<br>RIEIALGQAGATLADVVR<br>TRIVYTDISEFAAVAIQH<br>YVAFRKIRPVTSMVEVT<br>ALIAPGLLVEIEADAYGG<br>SHHHHHH                                      | MKKIEAIIRPFLDEVKIAL<br>VNAGIVGMTVSEVRGFG<br>RQKRGSEYTFEFLQKLG<br>LEIVLDEDVAEVILKIRE<br>AARTGENGDGKIFVSPVL<br>RVVRIRDGAMDEAAISA<br>WA                | 13.7 | 12.2 |
| T33-29.2 | MSRTMVSSGSKEEIEFG<br>YSRAVRIGPLVVVAGTT<br>GSGRTIAAQTEDALRRI<br>EIALGQAGATLADVVRT<br>RIYVTDISRWDEVGLVH<br>KNAFAKIRPVTSMVEVT<br>ALIAPGLLVEIEADAYGG<br>SHHHHHH                                      | MKKIEAIIRPFLDEVKIAL<br>VNAGIVGMTVSEVRGFG<br>RQKRGSEYTFEFLQKLG<br>LEIVLDEDVPLVINKIRE<br>AARTGENGDGKIFVSPV<br>ERVVRIRDGAMDELAISA<br>WS                | 13.7 | 12.3 |

|          |                                                                                                                                                                                                                                |                                                                                                                                                |      |      |
|----------|--------------------------------------------------------------------------------------------------------------------------------------------------------------------------------------------------------------------------------|------------------------------------------------------------------------------------------------------------------------------------------------|------|------|
| T33-30.1 | MSKAKIGIVTVSDRASA<br>GTLTDTNGLAIRSCLDM<br>YLTSEWEPIYQVIPDEQ<br>DVIETTLIKMADEQDCCL<br>IVTTGGTGPAKRDVTPE<br>ATEAVCDRMMPGFGEL<br>MRAESLKFVPTAILSQR<br>TAGLRGDSLIVNLPGSP<br>ESIFECLKAVFPAIPYCID<br>LMEGPYLECNERVIKPF<br>RPGSHHHHHH | MPFLELDTNLPANRVPA<br>GLEKKLCEQAAAAILGKPA<br>DRVNVTVRPGLAMALSG<br>STEPCAQLSISSIGVVGE<br>AERNLISRGFTDFLTKE<br>LALGQDRILIRFFPLESW<br>QIGKIGLVMTFE | 20.0 | 12.8 |
| T33-30.2 | MSKAKIGIVTVSDRASA<br>GTLTDTNGLAIRTALRRY<br>LTSEWEPIYQVIPDEQD<br>VIETTLIKMADEQDCCLI<br>VTTGGTGPAKRDVTPE<br>ATEAVCDRMMPGFGEL<br>MRAESLKFVPTAILSQR<br>TAGLRGDSLIVNLPGSP<br>ESIIECLKAVFPAIPYCID<br>LMEGPYLECNEKVIKPF<br>RPGSHHHHHH | MPFLELDTNLPANRVPA<br>GLEKRLCEVAAEILGKPA<br>DRVNVTVRPGLAMALSG<br>STEPCAQLSISSIGVVGT<br>AERNAVISAGFTDFLTKE<br>LALGQDRILIRFFPLESW<br>QIGKIGLVMTFD | 20.0 | 12.7 |
| T33-30.3 | MSKAKIGIVTVSDRASA<br>GVRLNRNGLAIETWLDL<br>YLTSEWEPIYQVIPDEQ<br>DVIETTLIKMADEQDCCL<br>IVTTGGTGPAKRDVTPE<br>ATEAVCDRMMPGFGEL<br>MRAESLKFVPTAILSQR<br>TAGLRGDSLIVNLPGDP<br>DSIIECLKAVFPAIPYCID<br>LMEGPYLECNEKVIKPF<br>RPGSHHHHHH | MPFLELDTNLPANRVPA<br>GLEKKLCRAAAEILGKPE<br>DRVNVTVRPGLAMALSG<br>STEPCAQLSISSIGVVGT<br>AERNALISRRFTDFLTKE<br>LALGQDRILIRFFPLESW<br>QIGKIGLVMTFD | 20.1 | 12.9 |



**Table S3. Amino acid sequence of individual T33 components for *in vitro* assembly.**

| Design    | Sequences                                                                                                                                                                                                              | MW   |
|-----------|------------------------------------------------------------------------------------------------------------------------------------------------------------------------------------------------------------------------|------|
| T33-06.1A | MHQIRVGVLTVSDSCFRNL<br>RPDLSGRALERYVQDPKLL<br>GGTISAYKIVPDEIEEIKETL<br>IDWCDEKELNLILTTGGTG<br>FAPRDVTPEATKEVIEREA<br>PGMALAMLMGSLNITPLG<br>MLSRPVCGIRGKTLIINLPG<br>SLLGSLRCFDFILPALPHAI<br>DLLRDAIVKVKEVHHGSHH<br>HHHH | 19.6 |
| T33-06.1B | MPVIQTFVSTPLDEDDRRA<br>LSLVYRYATEKILGKPADLV<br>MMTFHDSTPMHFFGSTDP<br>VACVRVEALGGYGPSEPE<br>EVTKLVTAAITEVCGIVADR<br>IFVLYFSPLHCGWNGTNVG<br>SHHHHHH                                                                      | 13.4 |
| T33-08.2A | MSPVVEVQGTIDELNSFIG<br>YALVLSRWDDIRNDFRIQ<br>NDLFVLGEDVSTGGKGRT<br>VTLEMIAELVKKSYKMKKEI<br>GKIELFVVPGGSVESASLH<br>MARAVSRRLERRIEAAKL<br>TEINELVLLYAQALSRILFM<br>HALISNKRLNIPEKIYGSHH<br>HHHH                           | 17.9 |
| T33-08.2B | MNQPIIEANGTDELTSFIG<br>EAKHYVDEEMKGILEEQN<br>DIYKIMGEIGSKGKIEGSD<br>ESLVKLLDLIERYEEMVNK<br>SFVLPGGTLES AKLDVCRT<br>IARRATLKVKTVLEEFGIGF<br>NAVLYLEVELSELLFLLARVI<br>EIEKNKEGSHHHHHH                                    | 17.2 |
| T33-11.1A | MEEVVLITVPSDEEAVTIAA<br>TLVSERLAACVNIVPGLTSL<br>YRWNNKVKSEKEYLLL VKT<br>TTHAFPCLKERVKALHSYT<br>VPEIVALPIAEGNREYLDW<br>LRENTKGSHHHHHH                                                                                   | 12.6 |
| T33-11.1B | MSQAIGILELTSIAKGMELG<br>DAMLKSANVDLLVSKTISP<br>GKFLMLGGDIGAIQQAIET<br>GVGQAGEMLVDSLVL ENIH<br>PSVLP AISGLNSVDKRQAV                                                                                                     | 20.1 |

|           |                                                                                                                                                                                                                                            |      |
|-----------|--------------------------------------------------------------------------------------------------------------------------------------------------------------------------------------------------------------------------------------------|------|
|           | GIVETWSVAACIKAANVAL<br>ESSDVTLVVRVHMAFGIGGK<br>CYMVVAGDVAQVELAVTA<br>ASLVAGSRGLLVYRSVIPR<br>PHEAMWRQMVEGGSHHH<br>HHH                                                                                                                       |      |
| T33-18.2A | MSLILVYSTFPNLEAKLIG<br>LKLLKKRLIACFNAFEITSA<br>YWEKGRIRTRREWAAIFKT<br>TEEKEKELYEELRKLHPYE<br>TPAIFTLKVENVLTEYMNW<br>LRESVGSHHHHHH                                                                                                          | 13.2 |
| T33-18.2B | MVYMVVYSQDRLTPSAKH<br>AVAQAITDAHLTHTGEEHS<br>LAQVNFQEQPAGNVFLGG<br>VQQGGDTIFVHGLHREGR<br>SDELKQRLITDIIAKVSIAAD<br>IDPKHIWVYFGEMPASQM<br>VEYGGLGSHHHHHH                                                                                     | 14   |
| T33-22.3A | MDSPIIEANGTDELTSFIG<br>EAKHYVDEEMKGILEEIQN<br>DIYKIMGEIGSKGKIEGISE<br>DRVAYLLELLLRYEKMNK<br>SFVLPGGTLES AKLDVCRT<br>IARRAERKVATVREFGIG<br>KVALRYLKVLERLLFLLARV<br>IEIEKNKEGSHHHHHH                                                         | 17.3 |
| T33-22.3B | MSQAIGILELTSIAKGMELG<br>DAMLKSANVDLLVSKTISP<br>GKFLMLGGDTGAIQQAIE<br>TGTSQAGEMLVSDLIKDI<br>HPSVLP AISGLNSVDKRQA<br>VGIVETWGV TACIIAADF AV<br>KGSNVTLVVRVHMAFGIGG<br>KCYMVVAGDVSDVNNAVD<br>VASRVAGALGLLVYRSVIP<br>RPHEAMWRQMVEGGSHH<br>HHHH | 20.2 |
| T33-24.3A | MPLLKFDLFYGRSDEQIKS<br>LIDAAHGAMVLAFGVPASD<br>RYQTVSQHRPGEMVLEDT<br>GLGYGR TDAVVLLTVISRP<br>RSEEQKVLFNRLLTAALEV<br>LCGISPDDVIVALVENS DA<br>DWSFGGGRAEFLTGD LVG<br>GSHHHHHH                                                                 | 15.2 |
| T33-24.3B | MSKAKIGIVTVSDRAFAGIY<br>EDISGKAIIDTLNDYLTSEW                                                                                                                                                                                               | 19.9 |

|  |                                                                                                                                                                           |  |
|--|---------------------------------------------------------------------------------------------------------------------------------------------------------------------------|--|
|  | EPIYRVVPDDKDIIVTTLAY<br>MALIEDCCLIVTTGGTGPA<br>KRDVTPEATEAVCDRMMP<br>GFGELMRAESLKFVPTAIL<br>SRQTAGLLGDSLIVNLPK<br>PKSIRECLDAVFPAIPYCID<br>LMEGPYLECNEAVIKPFRP<br>GSHHHHHH |  |
|--|---------------------------------------------------------------------------------------------------------------------------------------------------------------------------|--|
